# Supplementary material for: HIV-1-neutralizing antibody induced by simian adenovirus- and poxvirus MVA-vectored BG505 native-like envelope trimers
Source: PubMed Central journal article supplement (PMC5549892; doi:10.1371/journal.pone.0181886), 2017-08-09
Supplement: pone.0181886.s001.pdf [file pone.0181886.s001.pdf]

**S1 Table.** Reciprocal end-point titres of BG505s trimer-binding sera induced in individual rabbits.

|        |         | G1<br>CCC |       |       |      |         | median |
|--------|---------|-----------|-------|-------|------|---------|--------|
| Rabbit |         | M17       | M19   | M23   | F2   | F21     |        |
| Vacc 1 | Week 0  | 0         | 0     | 100   | 0    | 2       | 0      |
|        | Week 2  | 400       | 300   | 1000  | 1800 | 1500    | 1000   |
|        | Week 4  | 1500      | 3800  | 2100  | 1600 | 5700    | 2100   |
|        | Week 6  | 2400      | 4800  | 5100  | 6300 | 8600    | 5100   |
| Vacc 2 | Week 8  | 2000      | 5800  | 4200  | 2800 | 4600    | 4200   |
|        | Week 10 | 15800     | 16700 | 15300 | 4800 | Clotted | 15550  |
|        | Week 12 | 2500      | 10700 | 7100  | 7300 | 1600    | 7100   |
|        | Week 14 | 1500      | 4700  | 3700  | 4000 | Died    | 3850   |
|        | Week 16 | 2000      | 4200  | 3700  | 9200 |         | 3950   |
|        | Week 18 | 1400      | 2900  | 3600  | 5200 |         | 3250   |
| Vacc 3 | Week 24 | 900       | 1100  | 1600  | 5600 |         | 1350   |
|        | Week 26 | 300       | 1600  | 1600  | 4000 |         | 1600   |
|        | Week 28 | 400       | 2700  | 2900  | 4500 |         | 2800   |
|        | Week 30 | 300       | 1200  | 3000  | 3300 |         | 2100   |
|        | Week 32 | 300       | 1300  | 2300  | 5600 |         | 1800   |
|        | Week 34 | 300       | 1200  | 3900  | 3000 |         | 2100   |
|        | Week 36 | 200       | 1000  | 9400  | 2200 |         | 1600   |
|        | Week 38 | 200       | 900   | 2300  | 2300 |         | 1600   |

  

|        |         | G2<br>CPP |         |        |        |       | median |
|--------|---------|-----------|---------|--------|--------|-------|--------|
| Rabbit |         | M7        | M28     | F5     | F6     | F22   |        |
| Vacc 1 | Week 0  | 100       | 0       | 0      | 0      | 0     | 0      |
|        | Week 2  | 1300      | 600     | 1100   | 1200   | 600   | 1100   |
|        | Week 4  | 5800      | Clotted | 7600   | 7100   | 3300  | 6450   |
|        | Week 6  | 14000     | Clotted | 8900   | 7500   | 4200  | 8200   |
| Vacc 2 | Week 8  | 17300     | Died    | 4100   | 6200   | 4000  | 5150   |
|        | Week 10 | 133600    |         | 40300  | 118500 | 62800 | 118500 |
|        | Week 12 | 20300     |         | 7100   | 38900  | 10100 | 15200  |
|        | Week 14 | 19300     |         | 7000   | 10400  | 6500  | 10400  |
|        | Week 16 | 12600     |         | 3900   | 7200   | 3600  | 7200   |
|        | Week 18 | 6000      |         | 6400   | 5200   | 3000  | 6000   |
| Vacc 3 | Week 24 | 7800      |         | 6500   | 4000   | 1600  | 6500   |
|        | Week 26 | 295600    |         | 122300 | 195100 | 88400 | 195100 |
|        | Week 28 | 95400     |         | 46700  | 83800  | 65300 | 83800  |
|        | Week 30 | 72700     |         | 20700  | 63500  | 48500 | 63500  |
|        | Week 32 | 76200     |         | 12100  | 30400  | 33600 | 30400  |
|        | Week 34 | Died      |         | 10600  | 23100  | 38000 | 16850  |
|        | Week 36 |           |         | 10300  | 13600  | 24900 | 11950  |
|        | Week 38 |           |         | 7600   | 5700   | 12000 | 6650   |

  

|        |         | G4<br>MMM |      |      |      |      | median |
|--------|---------|-----------|------|------|------|------|--------|
| Rabbit |         | M8        | M24  | F14  | F20  | F31  |        |
| Vacc 1 | Week 0  | 100       | 0    | 0    | 0    | 0    | 0      |
|        | Week 2  | 100       | 0    | 0    | 0    | 100  | 0      |
|        | Week 4  | 100       | 0    | 0    | 0    | 0    | 0      |
|        | Week 6  | 100       | 300  | 200  | 0    | 100  | 100    |
| Vacc 2 | Week 8  | 100       | 500  | Died | 0    | 100  | 100    |
|        | Week 10 | 300       | 4400 |      | 0    | 6400 | 300    |
|        | Week 12 | 0         | 6400 |      | 0    | 1100 | 550    |
|        | Week 14 | 0         | Died |      | 100  | 2000 | 50     |
|        | Week 16 | 0         |      |      | 100  | 1700 | 50     |
|        | Week 18 | 0         |      |      | 100  | 1200 | 50     |
| Vacc 3 | Week 24 | 0         |      |      | 0    | 1200 | 0      |
|        | Week 26 | 100       |      |      | 1600 | 7000 | 850    |
|        | Week 28 | 0         |      |      | 3300 | 3200 | 1650   |
|        | Week 30 | 100       |      |      | 2800 | 1900 | 1450   |
|        | Week 32 | 100       |      |      | 2000 | 1200 | 1050   |
|        | Week 34 | 100       |      |      | 1500 | 1200 | 800    |
|        | Week 36 | 0         |      |      | 400  | 1000 | 200    |
|        | Week 38 | 0         |      |      | 1000 | 900  | 500    |

  

|        |         | G5<br>MPP |        |       |       |      | median |
|--------|---------|-----------|--------|-------|-------|------|--------|
| Rabbit |         | M9        | M15    | M18   | F29   | F30  |        |
| Vacc 1 | Week 0  | 0         | 0      | 100   | 1000  | 0    | 0      |
|        | Week 2  | 0         | 0      | 0     | 600   | 0    | 0      |
|        | Week 4  | 0         | 0      | 100   | 500   | Died | 50     |
|        | Week 6  | 400       | 100    | 100   | 1000  |      | 250    |
| Vacc 2 | Week 8  | 300       | 100    | 100   | 400   |      | 200    |
|        | Week 10 | 31600     | 1200   | 10500 | 49600 |      | 21050  |
|        | Week 12 | 6800      | 14100  | 7800  | 4100  |      | 7300   |
|        | Week 14 | 6400      | 4000   | 9900  | 2900  |      | 5200   |
|        | Week 16 | 5300      | 2400   | 10100 | 2300  |      | 3850   |
|        | Week 18 | 6500      | 1300   | 5900  | 2000  |      | 3950   |
| Vacc 3 | Week 24 | 2500      | 1200   | 4400  | 1600  |      | 2050   |
|        | Week 26 | 94800     | 210200 | 79100 | 21600 |      | 86950  |
|        | Week 28 | 75400     | 103000 | 34000 | 21500 |      | 54700  |
|        | Week 30 | 20300     | 40400  | 47500 | 13300 |      | 30350  |
|        | Week 32 | 22700     | 28100  | 21100 | 11800 |      | 21900  |
|        | Week 34 | 19300     | 30600  | 18000 | 5800  |      | 18650  |
|        | Week 36 | 8700      | 20400  | 9400  | 6400  |      | 9050   |
|        | Week 38 | 2800      | 36400  | 11900 | 2700  |      | 7350   |

  

|        |         | G3<br>PPP |       |       |         |         | median |
|--------|---------|-----------|-------|-------|---------|---------|--------|
| Rabbit |         | M10       | M12   | M27   | F4      | F13     |        |
| Vacc 1 | Week 0  | 0         | 0     | 0     | 100     | 100     | 0      |
|        | Week 2  | 400       | 600   | 800   | 2000    | 3500    | 800    |
|        | Week 4  | 500       | 2100  | 2100  | 7000    | 3900    | 2100   |
|        | Week 6  | 700       | 2100  | 2000  | 4500    | 4800    | 2100   |
| Vacc 2 | Week 8  | 1100      | 3100  | 1500  | 4400    | 2400    | 2400   |
|        | Week 10 | 41600     | 98500 | 43100 | 96700   | 63600   | 65700  |
|        | Week 12 | 40000     | 22900 | 34800 | 27100   | 39200   | 34800  |
|        | Week 14 | 15300     | 9800  | 32100 | 10700   | 17700   | 13000  |
|        | Week 16 | 10600     | 8000  | 35200 | 39900   | 12800   | 22900  |
|        | Week 18 | 15500     | 4600  | 12300 | 26300   | 9100    | 13900  |
| Vacc 3 | Week 24 | 6000      | 1500  | 5800  | 8500    | 4600    | 5900   |
|        | Week 26 | 356000    | 52500 | 69400 | 55800   | 150200  | 62600  |
|        | Week 28 | 64100     | 33300 | 40800 | Clotted | 63300   | 40800  |
|        | Week 30 | 31300     | 20200 | 29400 | Clotted | Missing | 29400  |
|        | Week 32 | 26600     | 12200 | 29300 | Died    | Died    | 26600  |
|        | Week 34 | 16400     | 8600  | 39300 |         |         | 16400  |
|        | Week 36 | 14600     | 5600  | 17300 |         |         | 14600  |
|        | Week 38 | 4100      | 4700  | 11400 |         |         | 4700   |

  

|        |         | G6<br>CMP |        |        |        |        | median |
|--------|---------|-----------|--------|--------|--------|--------|--------|
| Rabbit |         | M11       | M16    | F1     | F3     | F26    |        |
| Vacc 1 | Week 0  | 0         | 0      | 68     | 0      | 0      | 0      |
|        | Week 2  | 100       | 1500   | 500    | 400    | 400    | 400    |
|        | Week 4  | 500       | 10800  | 9100   | 4100   | 1600   | 4100   |
|        | Week 6  | 1100      | 6700   | 7900   | 7000   | 2700   | 6700   |
| Vacc 2 | Week 8  | 1600      | 3500   | 8200   | 9300   | 2500   | 3500   |
|        | Week 10 | 23700     | 255200 | 141900 | 287500 | 79400  | 198550 |
|        | Week 12 | 6700      | 36200  | 63900  | 194100 | 26500  | 36200  |
|        | Week 14 | 4100      | 38300  | 28800  | 59900  | 13700  | 33550  |
|        | Week 16 | 7000      | Died   | 20300  | 36400  | 8600   | 20300  |
|        | Week 18 | 2500      |        | 15200  | 33400  | 8400   | 15200  |
| Vacc 3 | Week 24 | 2500      |        | 9700   | 23100  | 7600   | 9700   |
|        | Week 26 | 58900     |        | 171000 | 179400 | 151600 | 171000 |
|        | Week 28 | 24300     |        | 104800 | 144400 | 68500  | 104800 |
|        | Week 30 | 43800     |        | 70700  | 64100  | 25600  | 64100  |
|        | Week 32 | 22600     |        | 67900  | 58900  | 34100  | 58900  |
|        | Week 34 | 17200     |        | 50400  | 44400  | 6900   | 44400  |
|        | Week 36 | 8800      |        | 37500  | 27400  | 20500  | 27400  |
|        | Week 38 | 7600      |        | 23900  | 24400  | 7800   | 23900  |

Columns on the left indicate time of vaccination and sampling, and the column on the right shows the median titre for a particular time point. Titres highlighted in green indicate peak responses after each vaccine administration.
